# Supplementary material for: Oxygen vacancy and nitrogen doping collaboratively boost performance and stability of TiO2-supported Pd catalysts for CO2 photoreduction: a DFT study
Source: Royal Society of Chemistry journal article supplement (doi:10.1039/d1cp03693a), 2021-01-01
Supplement: d1cp03693a1.pdf [file d1cp03693a1.pdf]

# Supporting Information

## Oxygen Vacancy and Nitrogen Doping Collaboratively Boost Performance and Stability of TiO<sub>2</sub>-supported Pd Catalysts for CO<sub>2</sub> Photoreduction: A DFT Study

Mingyue Zheng <sup>a</sup>, Jing Yang <sup>b</sup>, Weiliu Fan <sup>a,\*</sup>, Xian Zhao <sup>a</sup>

- a) School of Chemistry and Chemical Engineering, State Key Laboratory of Crystal Materials, Shandong University, Jinan 250100, China
- b) College of Chemical Engineering, Shijiazhuang University, Shijiazhuang, 050035, P. R. China

### Corresponding Author

\*fwl@sdu.edu.cn. Phone: +86 531 88366330

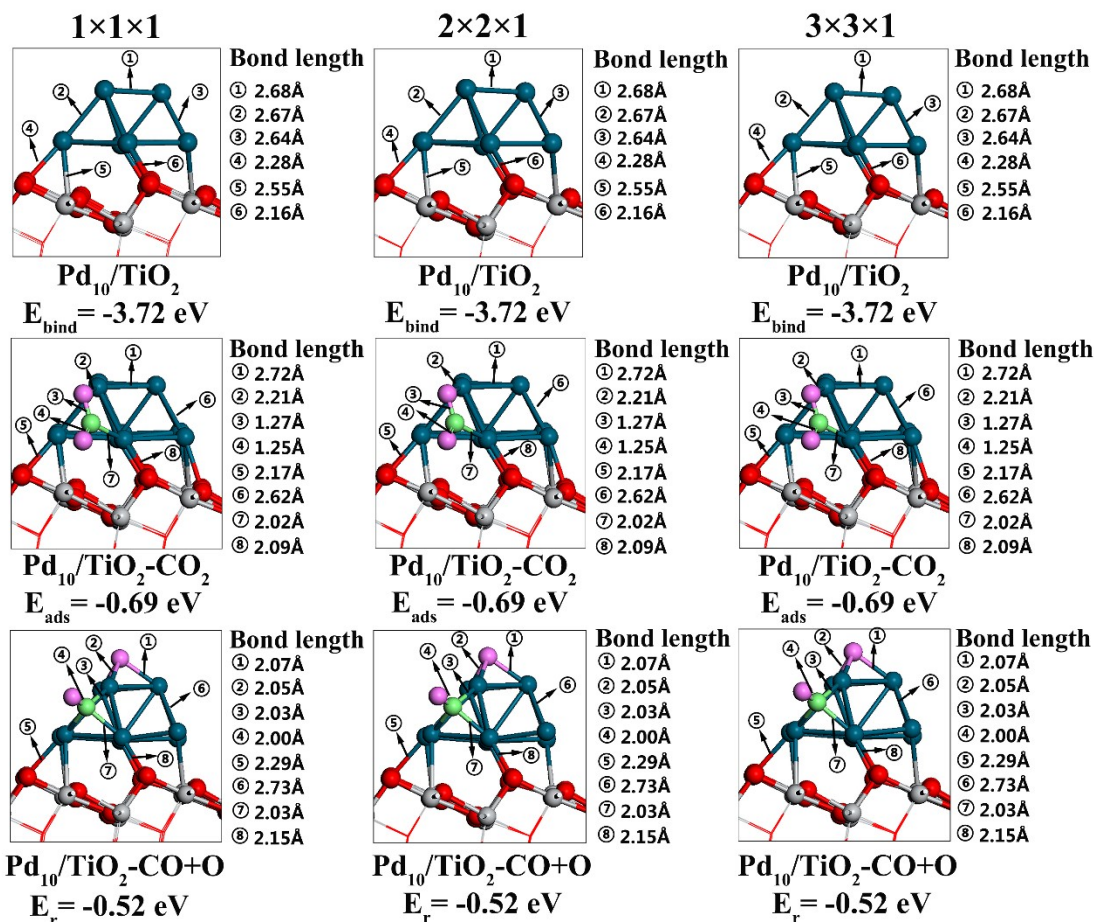

**Fig. S1.** Optimized structures of Pd<sub>10</sub>/TiO<sub>2</sub>, Pd<sub>10</sub>/TiO<sub>2</sub>-CO<sub>2</sub> and Pd<sub>10</sub>/TiO<sub>2</sub>-CO+O using different  $\kappa$ -point grids (1×1×1, 2×2×1 and 3×3×1). Typical bond lengths are listed beside the corresponding structures (right side). The  $E_{\text{bind}}$ ,  $E_{\text{ads}}$  and  $E_{\text{r}}$  are the binding energy of Pd<sub>10</sub> with TiO<sub>2</sub>, the adsorption energy of CO<sub>2</sub> and the reaction energy of CO<sub>2</sub> dissociation to CO and O on Pd<sub>10</sub>/TiO<sub>2</sub>. Color coding: red, O atoms in TiO<sub>2</sub>; pink, O atoms in CO<sub>2</sub>; green, C atoms; gray, Ti atoms; navy blue, Pd atoms.

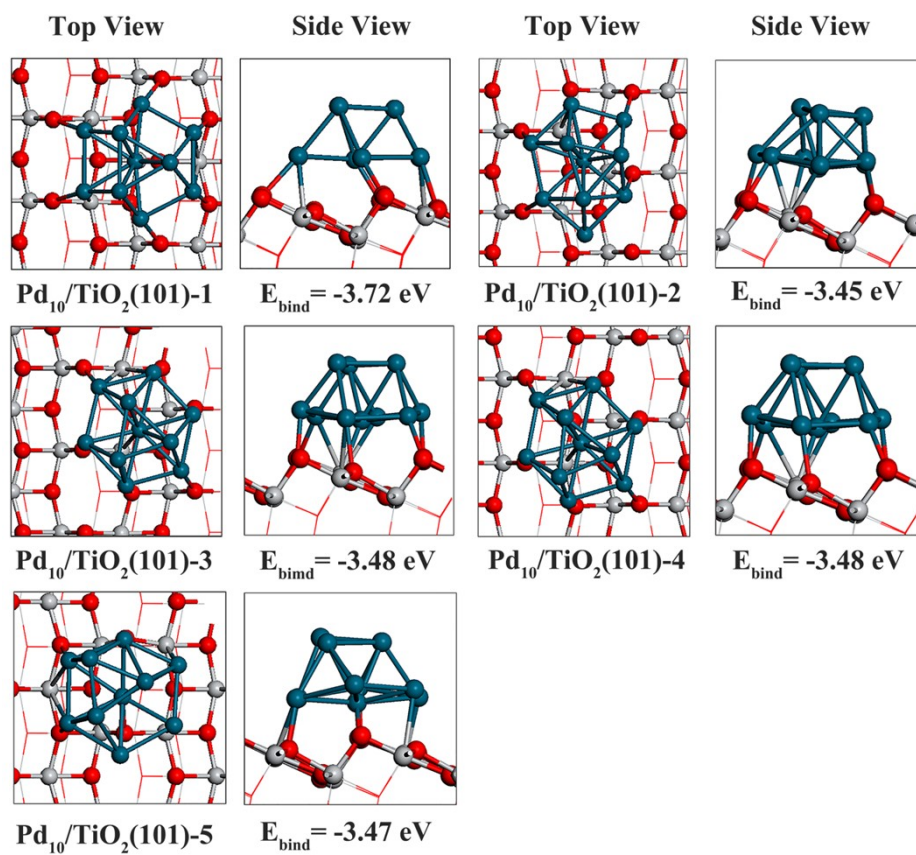

**Fig. S2.** Optimized configurations and binding energies of Pd<sub>10</sub> adsorbed at different positions of TiO<sub>2</sub>(101) by the bottom atomic plane (denoted as Pd<sub>10</sub>/TiO<sub>2</sub>(101)-b). See Fig. S1 for color coding.

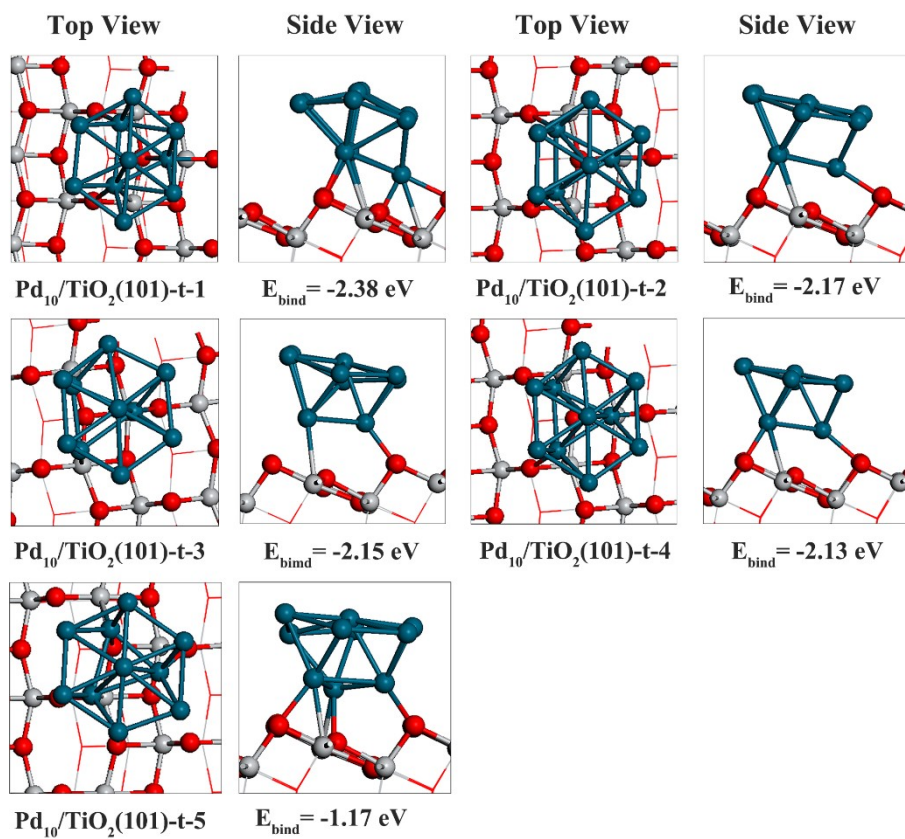

**Fig. S3.** Optimized configurations and binding energies of  $\text{Pd}_{10}$  cluster adsorbed at different positions of  $\text{TiO}_2(101)$  by the top atomic plane (denoted as  $\text{Pd}_{10}/\text{TiO}_2(101)\text{-t}$ ).

See Fig. S1 for color coding.

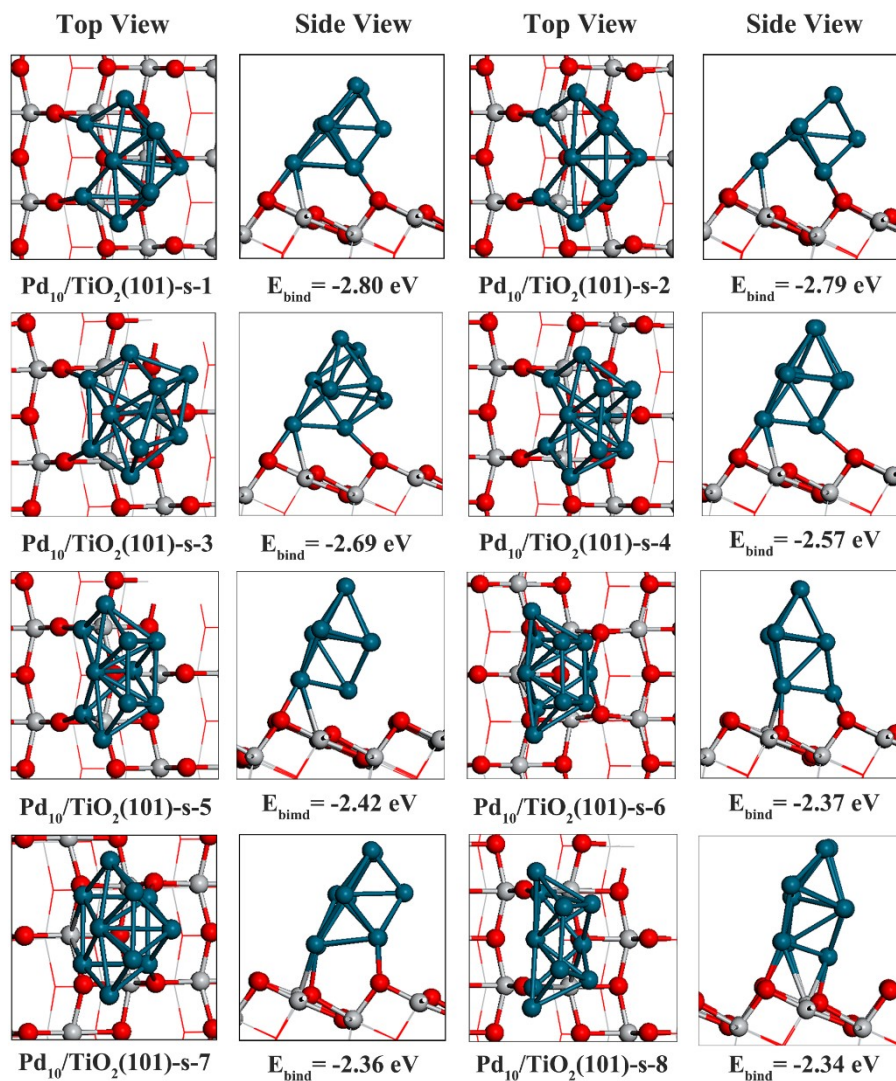

**Fig. S4.** Optimized configurations and binding energies of  $\text{Pd}_{10}$  cluster adsorbed at different positions of  $\text{TiO}_2(101)$  by the side atomic plane (denoted as  $\text{Pd}_{10}/\text{TiO}_2(101)\text{-s}$ ). See Fig. S1 for color coding.

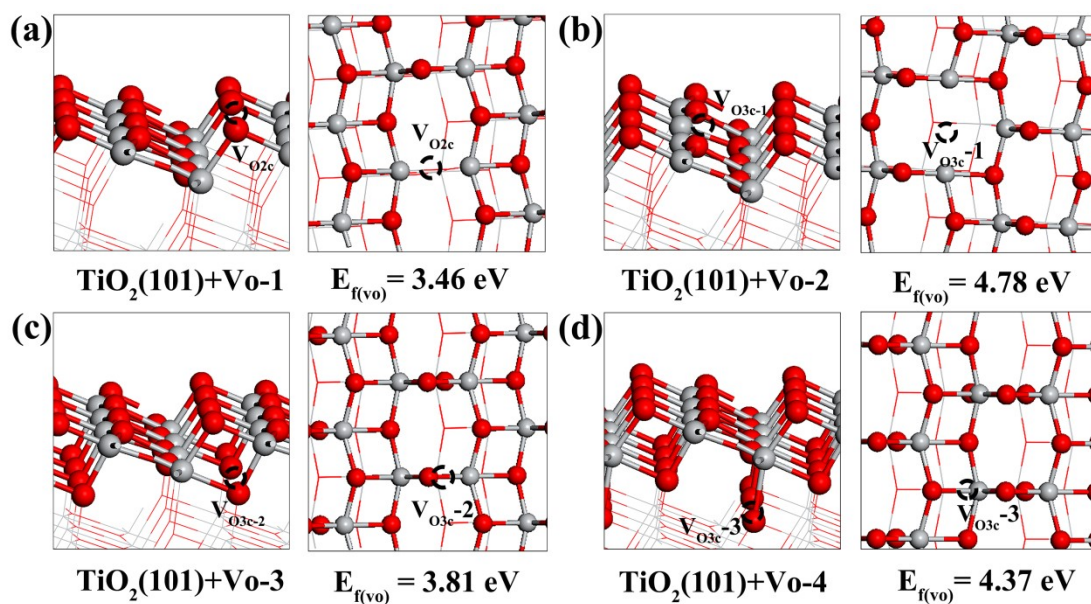

**Fig. S5.** Optimized structures and formation energies of different types of oxygen vacancy. (a)  $\text{V}_{\text{O}2\text{c}}$  on surface layer; (b)  $\text{V}_{\text{O}3\text{c}}$  on surface layer; (c-d)  $\text{V}_{\text{O}3\text{c}}$  on the sublayer. See Figure S1 for color coding. The dotted circle represents the oxygen vacancy.

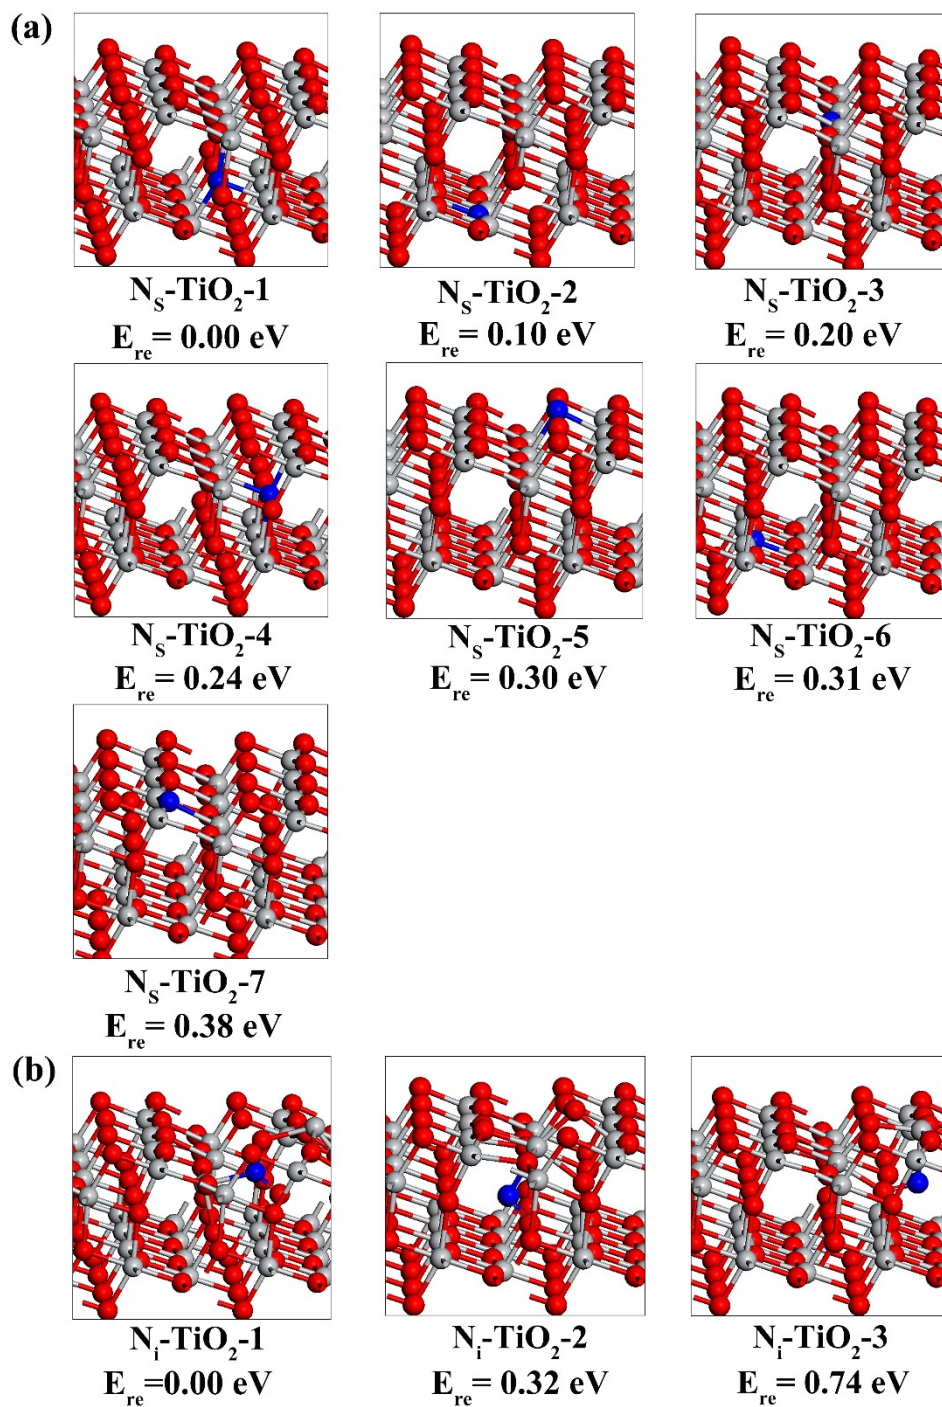

**Fig. S6.** Possible nitrogen doping sites for (a) substitutional N doping (N<sub>S</sub>-TiO<sub>2</sub>) and (b) interstitial N doping (N<sub>I</sub>-TiO<sub>2</sub>). The value under each configuration indicates its relative energy (E<sub>re</sub>) with respect to the most stable N<sub>S</sub>-TiO<sub>2</sub> and N<sub>I</sub>-TiO<sub>2</sub>, respectively.

See Fig. S1 for color coding.

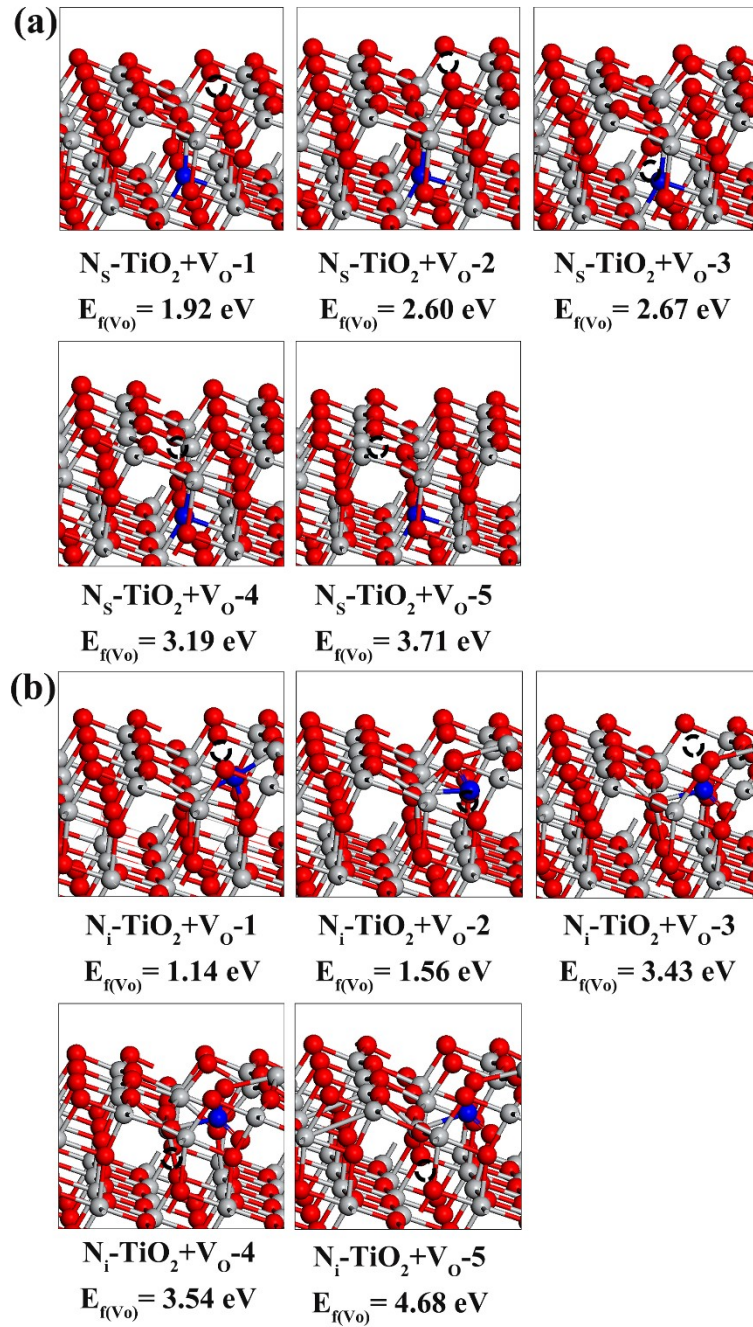

**Fig. S7.** The optimized structure and the forming energy of different  $V_{O_S}$  in (a)  $N_S\text{-TiO}_2+V_O$  and (b)  $N_I\text{-TiO}_2+V_O$ . See Fig. S1 for color coding. The dotted circle represents the oxygen vacancy.



**Table S1.** The coordinate numbers of each Pd atoms on various catalysts. The value in red is the coordinate number of the Pd atom serves as the active site.

|              | <b>Pd<sub>10</sub>/TiO<sub>2</sub></b> | <b>Pd<sub>10</sub>/TiO<sub>2</sub>+V<sub>o</sub></b> | <b>Pd<sub>10</sub>/N<sub>S</sub>-<br/>TiO<sub>2</sub>+V<sub>o</sub></b> | <b>Pd<sub>10</sub>/N<sub>i</sub>-<br/>TiO<sub>2</sub>+V<sub>o</sub></b> |
|--------------|----------------------------------------|------------------------------------------------------|-------------------------------------------------------------------------|-------------------------------------------------------------------------|
| <b>Pd-1</b>  | <b>5</b>                               | <b>5</b>                                             | <b>5</b>                                                                | <b>5</b>                                                                |
| <b>Pd-2</b>  | <b>5</b>                               | <b>5</b>                                             | <b>5</b>                                                                | <b>5</b>                                                                |
| <b>Pd-3</b>  | <b>5</b>                               | <b>5</b>                                             | <b>5</b>                                                                | <b>5</b>                                                                |
| <b>Pd-4</b>  | <b>4</b>                               | <b>5</b>                                             | <b>4</b>                                                                | <b>6</b>                                                                |
| <b>Pd-5</b>  | <b>5</b>                               | <b>6</b>                                             | <b>5</b>                                                                | <b>6</b>                                                                |
| <b>Pd-6</b>  | <b>5</b>                               | <b>6</b>                                             | <b>6</b>                                                                | <b>6</b>                                                                |
| <b>Pd-7</b>  | <b>4</b>                               | <b>5</b>                                             | <b>5</b>                                                                | <b>5</b>                                                                |
| <b>Pd-8</b>  | <b>5</b>                               | <b>4</b>                                             | <b>5</b>                                                                | <b>3</b>                                                                |
| <b>Pd-9</b>  | <b>5</b>                               | <b>4</b>                                             | <b>5</b>                                                                | <b>3</b>                                                                |
| <b>Pd-10</b> | <b>8</b>                               | <b>8</b>                                             | <b>9</b>                                                                | <b>8</b>                                                                |

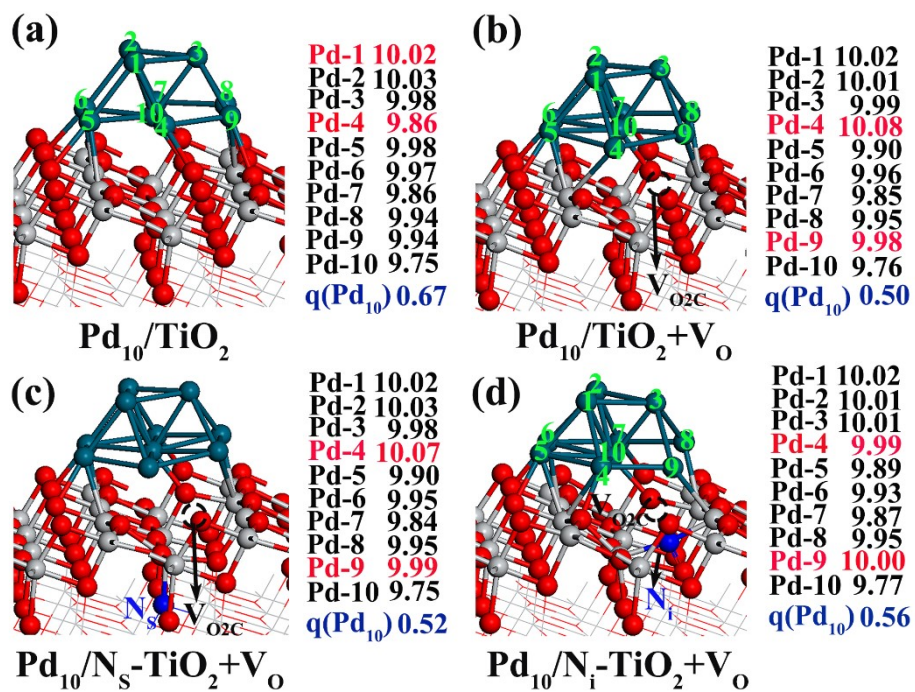

**Fig. S8.** The Bader charge analysis of (a) Pd<sub>10</sub>/TiO<sub>2</sub>(101), (b) Pd<sub>10</sub>/TiO<sub>2</sub>(101)+V<sub>O</sub>, (c) Pd<sub>10</sub>/N<sub>S</sub>-TiO<sub>2</sub>(101)+V<sub>O</sub>, and (d) Pd<sub>10</sub>/N<sub>i</sub>-TiO<sub>2</sub>(101)+V<sub>O</sub>. The unit of the Bader charge is e.

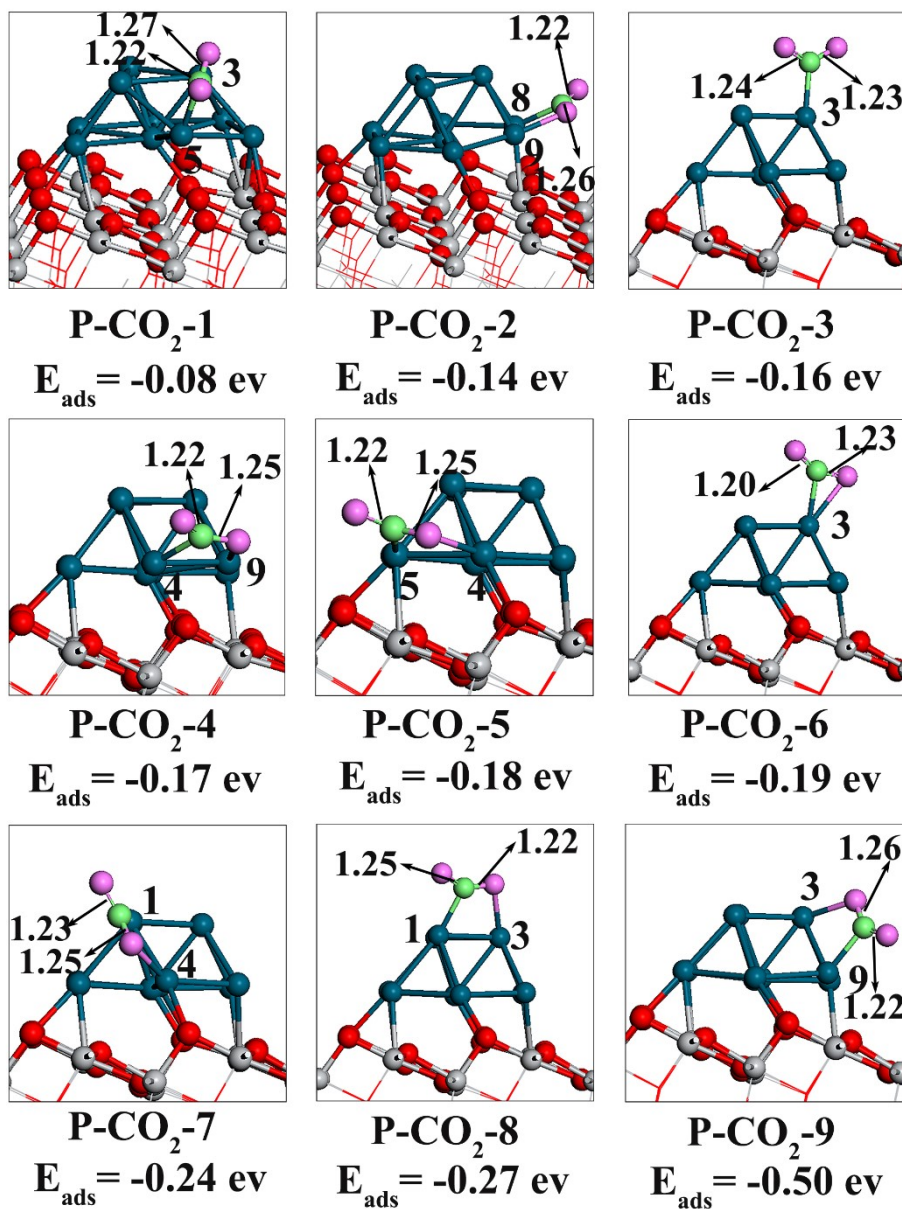

**Fig. S9.** Various adsorption configurations of CO<sub>2</sub> on Pd<sub>10</sub>/TiO<sub>2</sub>(101). Color coding is the same as in Fig. S1. The adsorption energy ( $E_{\text{ads}}$ ) have been marked in the figure.

The bond length is quoted in Å.

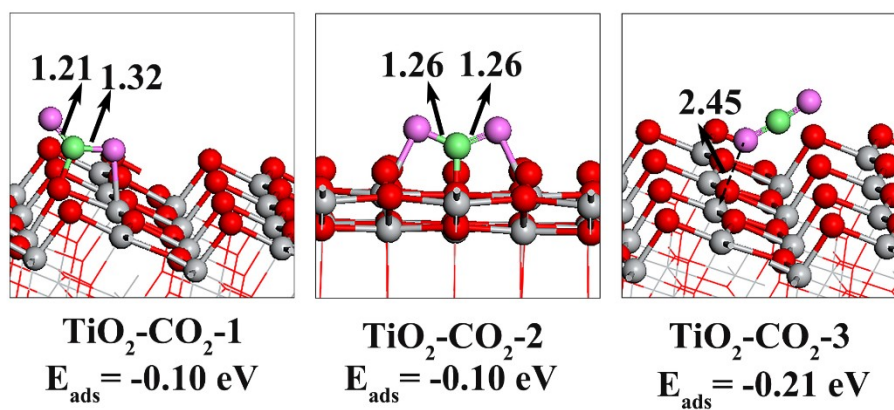

**Fig. S10.** Adsorption configurations of CO<sub>2</sub> on TiO<sub>2</sub>(101). Color coding is the same as in Fig. S1. The adsorption energy ( $E_{\text{ads}}$ ) have been marked in the figure. The bond length is quoted in Å.

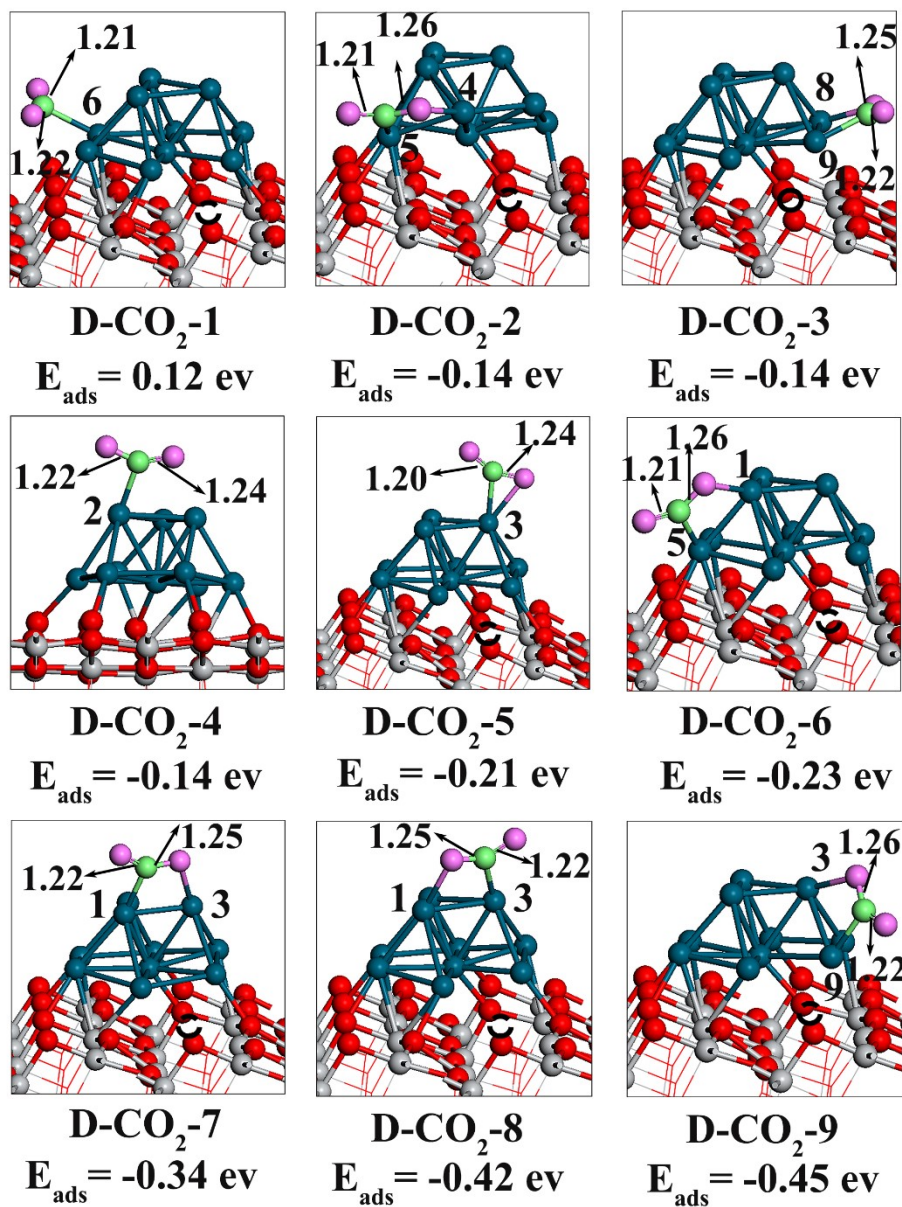

**Fig. S11.** Various adsorption configurations of CO<sub>2</sub> on Pd<sub>10</sub>/TiO<sub>2</sub>(101)+V<sub>O</sub> (denoted as D). The dotted circle represents the V<sub>O</sub>. Color coding is the same as in Fig. S1. The adsorption energy ( $E_{\text{ads}}$ ) have been marked in the figure. The bond length is quoted in Å.

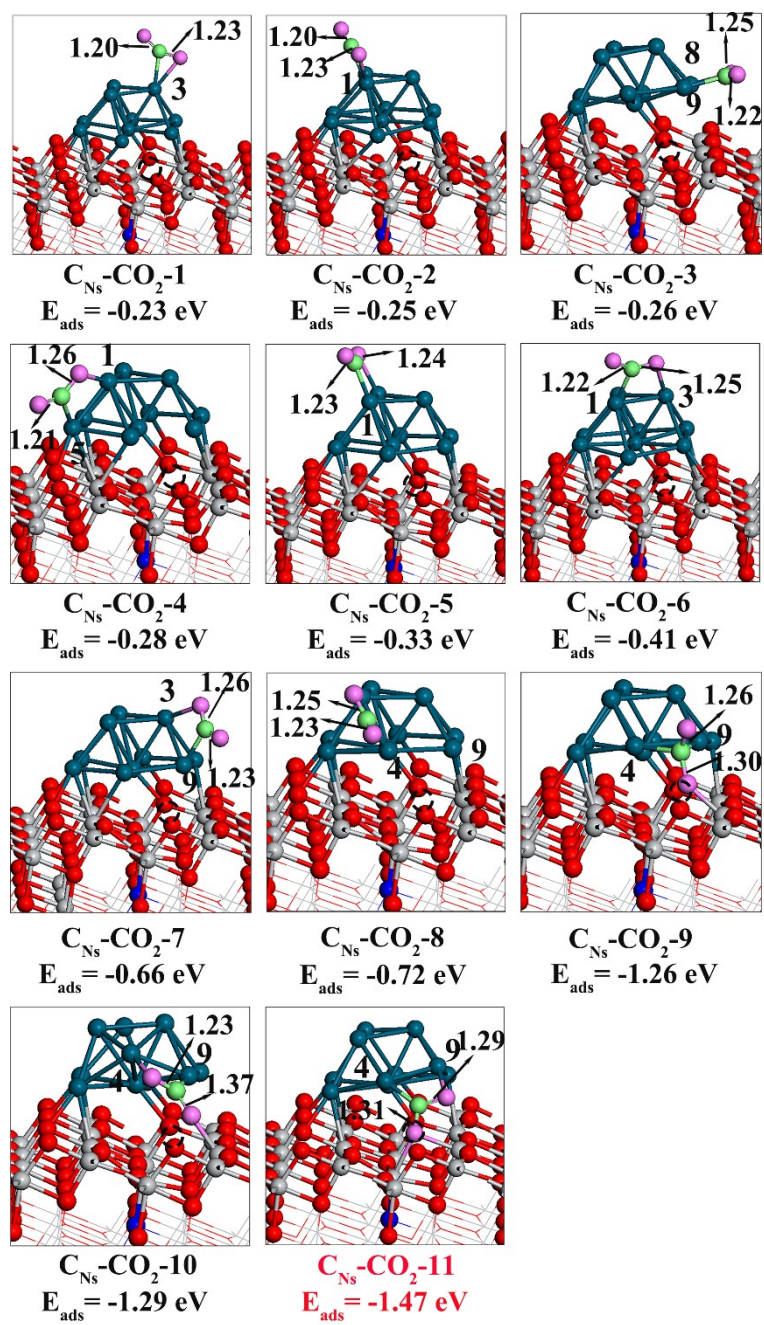

**Fig. S12.** Adsorption configurations of  $\text{CO}_2$  on  $\text{Pd}_{10}/\text{N}_s\text{-TiO}_2(101)+\text{V}_\text{O}$  (denoted as Cs). Color coding: blue, N atom; other atoms are the same as Fig. S1. The dotted circle represents the oxygen vacancy.

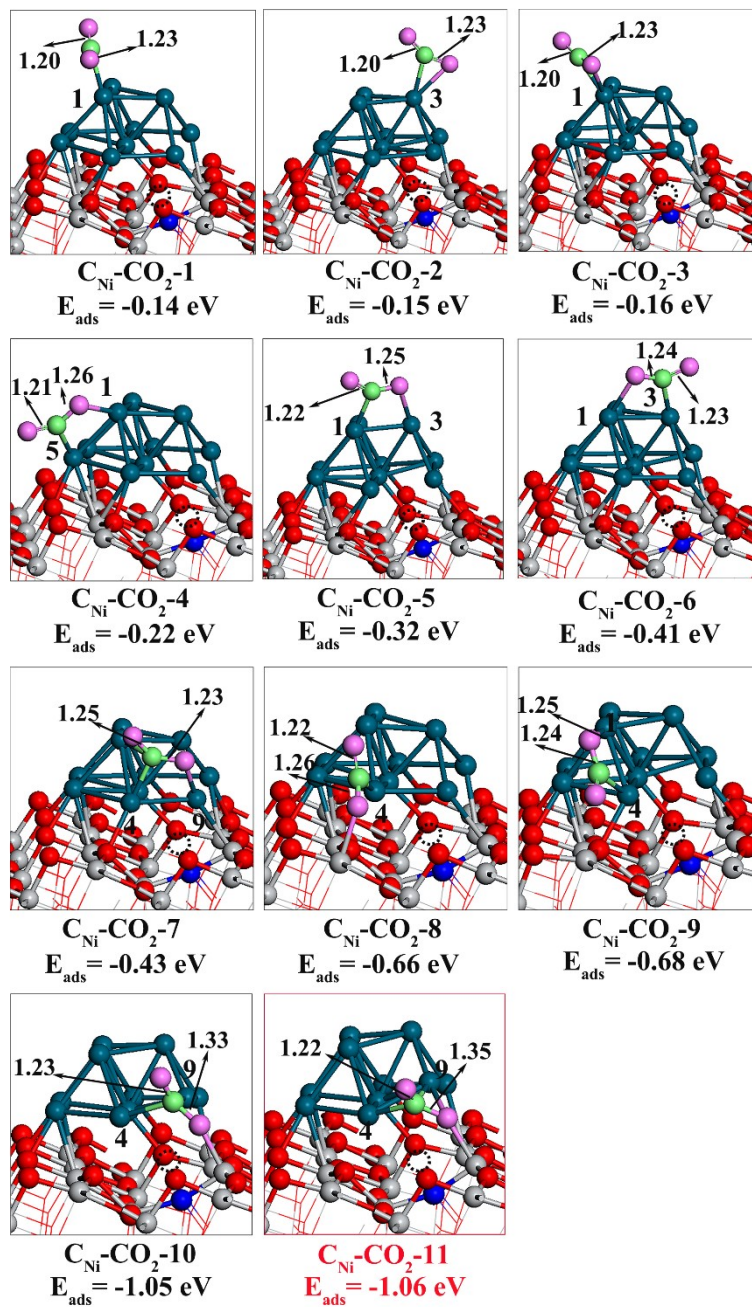

**Fig. S13.** Adsorption configurations of  $CO_2$  on  $Pd_{10}/Ni-TiO_2(101)+V_O$  (denoted as  $C_{Ni}$ ). See Fig. S1 for color coding. The dotted circle represents the oxygen vacancy.

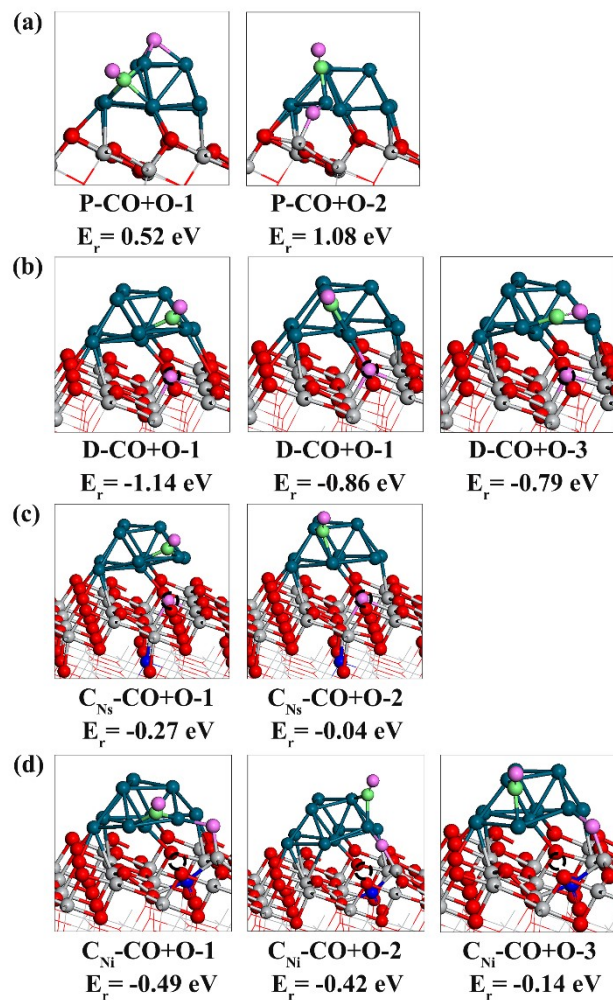

**Fig. S14.** CO<sub>2</sub> dissociation configurations on (a) Pd<sub>10</sub>/TiO<sub>2</sub>, (b) Pd<sub>10</sub>/TiO<sub>2</sub>+V<sub>O</sub>, (c) Pd<sub>10</sub>/N<sub>s</sub>-TiO<sub>2</sub>+V<sub>O</sub>, and (d) Pd<sub>10</sub>/N<sub>i</sub>-TiO<sub>2</sub>+V<sub>O</sub>. The reaction energy ( $E_r$ ) have been marked in the figure. See Fig. S1 for color coding. The dotted circle represents the oxygen vacancy.



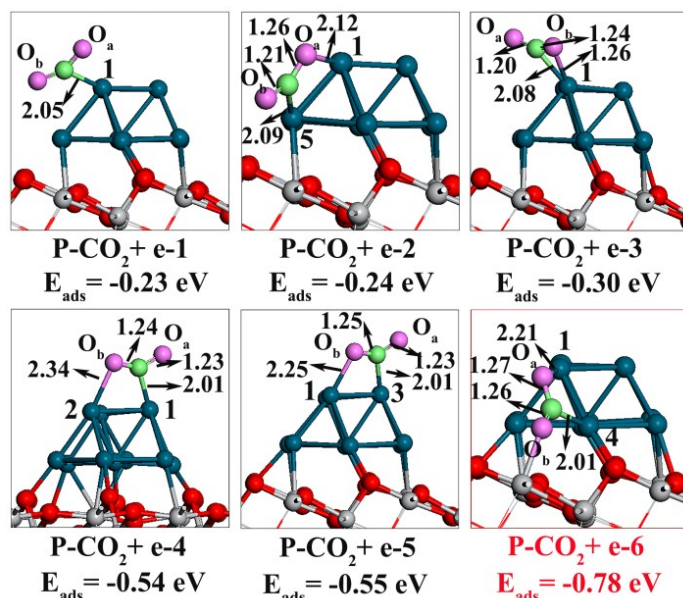

**Fig. S15.** Adsorption configurations of CO<sub>2</sub> on Pd<sub>10</sub>/TiO<sub>2</sub>(101) (denoted as P) in the presence of photoexcited electron. See Figure S7 for color coding.

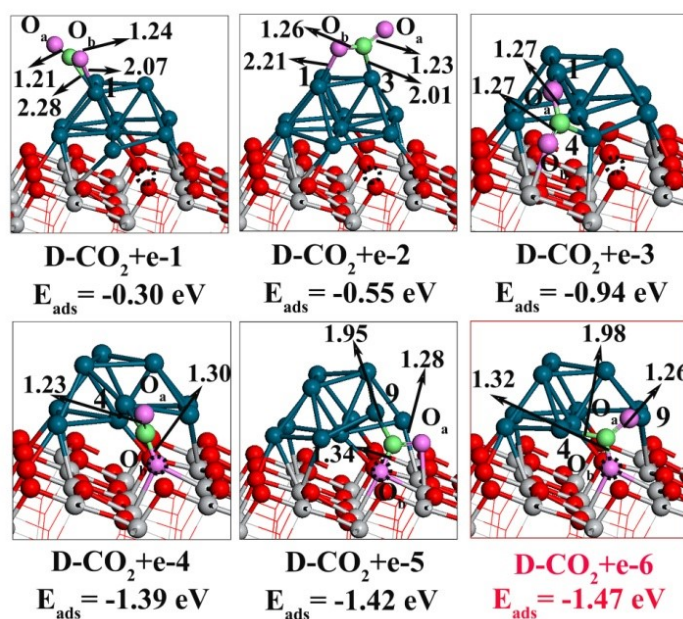

**Fig. S16.** Adsorption configurations of CO<sub>2</sub> on Pd<sub>10</sub>/TiO<sub>2</sub>(101)+V<sub>O</sub> (denoted as D) in the presence of photoexcited electron. See Figure S7 for color coding. The dotted circle represents the oxygen vacancy.

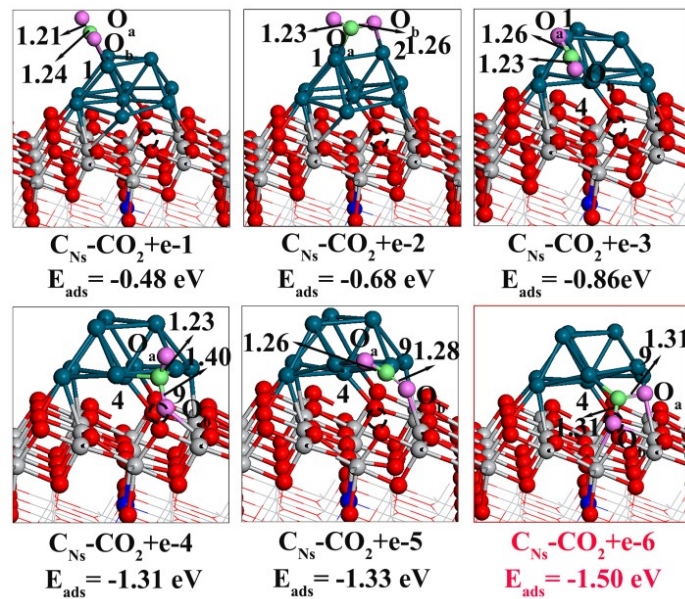

**Fig. S17.** Adsorption configurations of  $\text{CO}_2$  on  $\text{Pd}_{10}/\text{N}_s\text{-TiO}_2(101)+\text{V}_\text{O}$  (denoted as  $C_{\text{Ns}}$ ) in the presence of photoexcited electron. See Figure S7 for color coding. The dotted circle represents the oxygen vacancy.

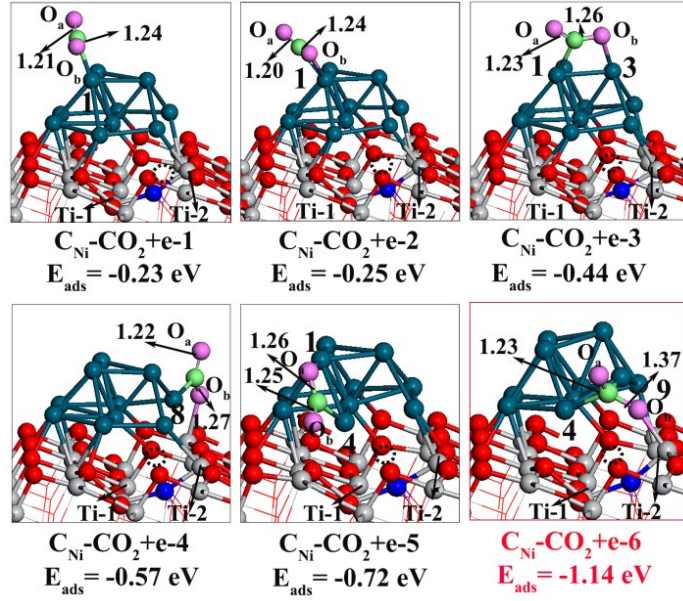

**Fig. S18.** Adsorption configurations of CO<sub>2</sub> on Pd<sub>10</sub>/Ni-TiO<sub>2</sub>(101)+V<sub>O</sub> (denoted as C<sub>Ni</sub>) in the presence of photoexcited electron. See Figure S7 for color coding. The dotted circle represents the oxygen vacancy.

**Table S2.** Bader charge on CO<sub>2</sub> and Pd<sub>10</sub> cluster before and after the addition of photoexcited electron.

|                                                                        | Without photoelectron |                           |             | With photoelectron    |                           |             |
|------------------------------------------------------------------------|-----------------------|---------------------------|-------------|-----------------------|---------------------------|-------------|
|                                                                        | E <sub>ads</sub> (eV) | q(CO <sub>2</sub> ) ( e ) | q(Pd) ( e ) | E <sub>ads</sub> (eV) | q(CO <sub>2</sub> ) ( e ) | q(Pd) ( e ) |
| Pd <sub>10</sub> /TiO <sub>2</sub> (101)                               | -0.69                 | -0.55                     | 0.67        | -0.78                 | -0.64                     | 0.34        |
| Pd <sub>10</sub> /TiO <sub>2</sub> (101)+V <sub>O</sub>                | -1.58                 | -0.96                     | 0.50        | -1.47                 | -0.99                     | 0.28        |
| Pd <sub>10</sub> /N <sub>5</sub> TiO <sub>2</sub> (101)+V <sub>O</sub> | -1.47                 | -0.95                     | 0.52        | -1.50                 | -1.05                     | 0.30        |
| Pd <sub>10</sub> /N <sub>i</sub> TiO <sub>2</sub> (101)+V <sub>O</sub> | -1.06                 | -0.73                     | 0.56        | -1.14                 | -0.87                     | 0.31        |
